# Supplementary material for: Insight into the Loading Properties of Na+ Green-Functionalized Clinoptilolite as a Potential Carrier for the 5-Fluorouracil Drug, its Release Kinetics, and Cytotoxicity
Source: PubMed Central journal article supplement — ACS Omega. 2022 Feb 15;7(8):6991–7001. doi: 10.1021/acsomega.1c06671 (PMC8892477; doi:10.1021/acsomega.1c06671), 2022-02-15
Supplement: ao1c06671_si_001.pdf [file ao1c06671_si_001.pdf]

## Supporting Information

### Insight into the loading properties of Na<sup>+</sup> green functionalized clinoptilolite as potential carrier for 5-Fluorouracil drug; release kinetics and cytotoxicity

Mohamed Adel Sayed<sup>1, 2</sup>, Hayam M. El-Zeiny<sup>1,2</sup>, Jong Seong Khim<sup>3</sup>, Jamaan S. Ajarem<sup>4</sup>, Ahmed A. Allam<sup>5</sup>, Mostafa R. Abukhadra<sup>1,6\*</sup>,

<sup>1</sup>Materials Technologies and their Applications Lab, Geology Department, Faculty of Science, Beni-Suef University, Beni suef City, Egypt.

<sup>2</sup>Department of Chemistry, Faculty of Science, Beni-Suef University, 62514 Beni-Suef City, Egypt

<sup>3</sup>School of Earth & Environmental Sciences, College of Natural Sciences, Seoul National University, Seoul 08826, Republic of Korea

<sup>4</sup>Zoology Department, College of Science, King Saud University, Riyadh, Saudi Arabia.

<sup>5</sup>Zoology Department, Faculty of Science, Beni-Suef University, Beni-Suef, Egypt

<sup>6</sup>Geology Department, Faculty of Science, Beni-Suef University, Egypt

Corresponding author Email\*: [Abukhadra89@Scinec.bsu.edu.eg](mailto:Abukhadra89@Scinec.bsu.edu.eg)

## Content

1. The representative equations of the studied kinetic and isotherm models in their linear and nonlinear forms .....S2

**Table S1.** The representative equations of the studied kinetic and isotherm models in their linear and nonlinear forms

| <b>Kinetic models</b>       |                                           |                                                                                                                                                                                                     |
|-----------------------------|-------------------------------------------|-----------------------------------------------------------------------------------------------------------------------------------------------------------------------------------------------------|
| <b>Model</b>                | <b>Linear equation</b>                    | <b>Parameters</b>                                                                                                                                                                                   |
| <b>Pseudo-first-order</b>   | $q_t = q_e (1 - e^{-k_1 t})$              | $q_t$ (mg g <sup>-1</sup> ) is the adsorbed ions at time (t), and $K_1$ is the rate constant of the first-order adsorption (min <sup>-1</sup> )                                                     |
| <b>Pseudo-second-order</b>  | $q_t = \frac{q_e^2 k_2 t}{1 + q_e k_2 t}$ | $q_e$ is the quantity of adsorbed ions after equilibration (mg g <sup>-1</sup> ), and $K_2$ is the model rate constant (g mg <sup>-1</sup> min <sup>-1</sup> ).                                     |
| <b>Isotherm models</b>      |                                           |                                                                                                                                                                                                     |
| <b>Model</b>                | <b>Equation</b>                           | <b>Parameters</b>                                                                                                                                                                                   |
| <b>Langmuir</b>             | $q_e = \frac{q_{max} b C_e}{(1 + b C_e)}$ | $C_e$ is the rest ions concentrations (mg L <sup>-1</sup> ), $q_{max}$ is the theoretical maximum adsorption capacity (mg g <sup>-1</sup> ), and $b$ is the Langmuir constant (L mg <sup>-1</sup> ) |
| <b>Freundlich</b>           | $q_e = K_f C_e^{1/n}$                     | $K_f$ is the constant of Freundlich model related to the adsorption capacity and $n$ is the constant of Freundlich model related to the adsorption intensities                                      |
| <b>Dubinin–Radushkevich</b> | $q_e = q_m e^{-\beta \varepsilon^2}$      | $\beta$ (mol <sup>2</sup> KJ <sup>-2</sup> ) is the D-R constant, $\varepsilon$ (KJ <sup>2</sup> mol <sup>-2</sup> ) is the polanyiil potential, and $q_m$ is the adsorption capacity               |
